# Supplementary material for: Loss of PTPRM Associates with the Pathogenic Development of Colorectal Adenoma-Carcinoma Sequence
Source: PubMed Central journal article supplement (PMC5386118; doi:10.1038/srep09633), 2015-04-24
Supplement: srep09633-s1.pdf [file srep09633-s1.pdf]

## Supporting information

### Loss of *PTPRM* Associates with the Pathogenic Development of Colorectal Adenoma-Carcinoma Sequence

Putty-Reddy Sudhir<sup>1</sup>, Shiu-Ting Lin<sup>1</sup>, Chien Chia-Wen<sup>1</sup>, Shung-Haur Yang<sup>2</sup>, Anna Fen-Yau Li<sup>3</sup>, Rai-Hua Lai<sup>1</sup>, Mei-Jung Wang<sup>1</sup>, Yuan-Tsong Chen<sup>1</sup>, Chian-Feng Chen<sup>4</sup>, Yuh-Shan Jou<sup>1</sup>, and Jeou-Yuan Chen<sup>1,5\*</sup>

<sup>1</sup>*Institute of Biomedical Sciences, Academia Sinica, Taipei, Taiwan, ROC;* <sup>2</sup>*Departments of Surgery and* <sup>3</sup>*Pathology, Taipei Veterans General Hospital, Taiwan, ROC;* <sup>4</sup>*VYM Genome Research Center, Taiwan, ROC;* <sup>5</sup>*Institute of Genome Sciences, National Yang-Ming University, Taipei, Taiwan, ROC*

**Supplementary Table S1.** Minimal common regions of CNAs associated with colon carcinomas identified by 100K oligonucleotide array analysis are listed. These minimal CNAs were identified by CNAG analysis and further confirmed by dCHIP analysis in at least two samples. The 19 gain regions identified in both adenomas and carcinomas by CNAG and dCHIP analyses are shown with asterisk. CN gains (+), CN loss (-), cytoband, physical position, and samples involving adenomas (A) and carcinomas (T) are shown.

| Cytoband      | CNAG /dCHIP analysis    |                            |
|---------------|-------------------------|----------------------------|
|               | Minimal common region   | Samples involved           |
| + 6q16.1      | 94,211,682-94,229,212   | 10A, 11A, 12A              |
| + 6q24.1-24.2 | 142,881,191-144,554,694 | 11A, 12A, 3T, 5T           |
| + 6q25.3      | 155,789,931-158,108,265 | 11A, 12A, 3T, 5T           |
| + 7p22.3-21.3 | 250,149-8,783,476       | 2A, 3A, 3T, 6T, 7T, 8T     |
| + 7p21.3-21.2 | 12,294,465-13,254,072   | 2A, 3A, 2T, 3T, 6T, 7T, 8T |
| + 7p21.1      | 16,181,205-18,220,618   | 2A, 3A, 2T, 3T, 6T, 7T, 8T |

|                 |                          |                                           |
|-----------------|--------------------------|-------------------------------------------|
| + 7p21.1-14.2   | 19,732,775-36,908,719    | 2A, 3A, 2T, 3T, 6T, 7T, 8T                |
| + 7p14.1-12.3   | 38,105,534-48,771,286    | 2A, 3A, 2T, 3T, 6T, 7T, 8T                |
| + 7p12.3        | 49,309,682-49,610,949    | 2A, 3A, 10A, 11A, 14A, 2T, 3T, 6T, 7T, 8T |
| + 7p12.2-12.1   | 49,916,060-52,226,412    | 2A, 3A, 2T, 3T, 6T, 7T, 8T                |
| + 7p12.1-11.1   | 53,498,522-57,653,125    | 2A, 3A, 2T, 3T, 6T, 7T, 8T                |
| + 7q21.13-31.1  | 88,727,093-108,170,237   | 2A, 3A, 3T, 6T, 7T, 8T                    |
| + 7q31.2-31.31  | 114,825,957-120,500,140  | 2A, 3A, 3T, 6T, 7T, 8T                    |
| + 7q36.2-36.3   | 152,455,069-158,624,663  | 2A, 3A, 3T, 5T, 6T, 7T, 8T                |
| + 8p23.3-23.2   | 2,131,936-2,354,297      | 11A, 13A, 14A                             |
| + 8q11.1-11.21  | 47,365,080-48,899,777    | 2T, 3T, 5T, 6T, 8T                        |
| + 8q11.21-11.23 | 52,263,997-53,403,770    | 11A, 12A, 2T, 5T, 6T, 8T                  |
| + 8q12.1        | 59,695,261-60,005,224    | 1T, 2T, 5T, 6T, 8T                        |
| + 8q12.2-12.3   | 61,926,630-63,034,569    | 1T, 2T, 3T, 5T, 6T, 8T                    |
| + 8q13.2        | 68,333,486-70,373,374    | 2T, 5T, 6T, 8T                            |
| + 8q13.3-21.11  | 73,254,861-74,383,960    | 2T, 3T, 5T, 6T, 8T                        |
| + 8q21.11       | 74,492,438-75,880,359    | 2T, 3T, 5T, 6T, 8T                        |
| + 8q21.12-21.13 | 80,134,969-80,660,427    | 11A, 12A, 2T, 3T, 5T, 6T, 8T              |
| + 8q21.13       | 81,208,496-82,860,180    | 1T, 2T, 3T, 5T, 6T, 8T                    |
| + 8q21.13       | 83,311,297-83,415,682    | 2T, 3T, 5T, 6T, 8T                        |
| + 8q21.13       | 83,457,039-83,596,175    | 2T, 3T, 5T, 6T, 8T                        |
| + 8q21.2        | 85,946,905-86,526,160    | 2T, 5T, 6T, 8T                            |
| + 8q21.2-21.3   | 86,578,680-87,658,121    | 2T, 5T, 6T, 8T                            |
| + 8q21.3        | 88,669,709-89,287,326    | 2T, 5T, 6T, 8T                            |
| + 8q21.3        | 90,709,838-92,033,734*   | 11A, 12A, 2T, 3T, 5T, 6T, 8T              |
| + 8q22.1        | 94,453,866-95,348,936    | 11A, 12A, 1T, 2T, 5T, 6T, 8T              |
| + 8q22.1-22.2   | 99,007,325-100,014,623*  | 11A, 12A, 1T, 2T, 3T, 5T, 6T, 8T          |
| + 8q22.2-22.3   | 101,557,726-104,458,292  | 11A, 12A, 1T, 2T, 5T, 6T, 8T              |
| + 8q23.1        | 107,526,431-109,218,441  | 2T, 3T, 5T, 6T, 8T                        |
| + 8q23.1-23.3   | 110,122,659-112,917,443  | 2T, 5T, 6T, 8T                            |
| + 8q23.3        | 113,002,881-114,055,290  | 2T, 3T, 5T, 6T, 8T                        |
| + 8q23.3        | 114,346,369-115,097,126  | 2T, 3T, 5T, 6T, 8T                        |
| + 8q24.11       | 117,789,411-118,265,984  | 1T, 2T, 5T, 6T, 8T                        |
| + 8q24.11       | 118,393,066-118,844,178* | 11A, 12A, 1T, 2T, 5T, 6T, 8T              |
| + 8q24.11-24.12 | 119,005,983-119,333,613  | 11A, 12A, 1T, 2T, 5T, 6T, 8T              |
| + 8q24.12       | 120,399,504-121,147,495  | 1T, 2T, 3T, 5T, 6T, 8T                    |
| + 8q24.13-24.21 | 124,731,100-129,166,049  | 1T, 2T, 3T, 5T, 6T, 8T                    |
| + 8q24.21       | 129,177,879-130,098,574  | 1T, 2T, 3T, 5T, 6T, 8T                    |

|                  |                          |                                           |
|------------------|--------------------------|-------------------------------------------|
| + 8q24.21        | 130,413,367-131,108,691  | 1T, 2T, 3T, 5T, 6T, 8T                    |
| + 8q24.23        | 139,138,355-139,261,730  | 1T, 2T, 3T, 5T, 6T, 8T                    |
| + 8q24.3         | 140,538,976-140,640,767  | 9A, 10A, 11A, 12A, 1T, 2T, 3T, 5T, 6T, 8T |
| + 8q24.3         | 140,665,174-140,805,057* | 9A, 10A, 11A, 12A, 1T, 2T, 3T, 5T, 6T, 8T |
| + 8q24.3         | 142,072,079-146,052,174  | 1T, 2T, 3T, 5T, 6T, 8T                    |
| + 12p12.1        | 22,535,457-24,308,820*   | 11A, 12A, 5T, 7T                          |
| + 12q12          | 40,876,491-42,688,707*   | 11A, 12A, 5T, 7T                          |
| + 12q12-13.11    | 43,002,077-46,023,714    | 5T, 7T                                    |
| + 13q12.13-12.3  | 25,659,382-30,486,273*   | 3A, 12A, 1T, 2T, 3T, 5T                   |
| + 13q13.3        | 37,635,092-38,496,395*   | 3A, 12A, 2T, 3T, 5T                       |
| + 13q14.11-14.13 | 39,852,138-45,310,109*   | 3A, 12A, 1T, 2T, 3T, 5T                   |
| + 13q14.3-21.1   | 52,997,850-58,495,007*   | 3A, 12A, 2T, 3T, 5T                       |
| + 13q21.2        | 58,572,030-60,726,339*   | 3A, 12A, 2T, 3T, 5T                       |
| + 13q21.2-21.33  | 60,816,564-70,223,053*   | 3A, 12A, 2T, 3T, 5T                       |
| + 13q22.1        | 72,583,695-73,033,999*   | 3A, 12A, 1T, 2T, 3T, 5T, 6T               |
| + 13q22.2        | 74,725,315-74,918,459*   | 3A, 12A, 1T, 2T, 3T, 5T, 6T               |
| + 13q31.1        | 84,731,597,-85,139,789*  | 3A, 12A, 1T, 2T, 3T, 5T                   |
| + 13q31.3        | 90,532,984-91,293,729*   | 3A, 12A, 1T, 2T, 3T, 5T                   |
| + 13q32.1-32.3   | 95,724,865-100,190,749*  | 3A, 12A, 1T, 2T, 3T, 5T                   |
| + 13q33.1-33.2   | 103,314,852-104,473,863* | 3A, 12A, 2T, 3T, 5T                       |
| + 15q21.1        | 44,155,507-44,569,827    | 10A, 11A, 12A                             |
| + 15q21.3        | 55,848,087-55,878,620    | 10A, 11A, 12A                             |
| + 15q22.2        | 61,049,905-61,052,297    | 10A, 11A, 12A                             |
| + 20p11.23-11.21 | 19,906,303-24,997,283    | 1T, 3T, 6T                                |
| + 20q11.21       | 29,309,964-30,949,712    | 1T, 2T, 3T, 5T, 6T                        |
| + 20q11.21-11.22 | 31,224,759-31,919,527    | 1T, 2T, 3T, 5T, 6T                        |
| + 20q11.22-11.23 | 31,946,293-36,910,448    | 1T, 2T, 3T, 5T, 6T                        |
| + 20q11.23-12    | 37,054,302-40,624,919    | 1T, 2T, 3T, 5T, 6T                        |
| + 20q13.13       | 46,296,791-47,764,927    | 9A, 12A, 1T, 2T, 3T, 5T, 6T               |
| + 20q13.13-13.2  | 47,868,388-49,291,771*   | 9A, 12A, 1T, 2T, 3T, 5T, 6T               |
| + 20q13.2        | 49,387,119-50,001,018    | 9A, 12A, 1T, 2T, 3T, 5T, 6T               |
| + 20q13.2-13.31  | 50,345,902-53,643,287    | 1T, 2T, 3T, 5T, 6T                        |
| + 20q13.31       | 53,665,970-54,804,260    | 1T, 2T, 3T, 5T, 6T                        |
| + 20q13.31-13.32 | 54,946,661-55,465,932    | 1T, 2T, 3T, 5T, 6T                        |
| + 20q13.32       | 55,526,741-56,740,860    | 1T, 2T, 3T, 5T, 6T                        |
| + 20q13.32       | 57,034,050-57,352,911    | 1T, 2T, 3T, 5T, 6T                        |

|                  |                         |                                  |
|------------------|-------------------------|----------------------------------|
| + 20q13.33       | 59,832,199-59,834,230   | 9A, 10A, 12A, 1T, 2T, 3T, 5T, 6T |
| - 1p36.23-36.21  | 7,572,245-14,788,323    | 5T, 6T                           |
| - 4q34.3         | 179,246,247-183,373,475 | 3T, 6T                           |
| - 5q21.3-22.3    | 107,430,837-113,333,210 | 2A, 11A, 14A, 3T, 6T             |
| - 8p22           | 13,833,679-14,445,035   | 2T, 5T, 6T                       |
| - 15q21.1-21.2   | 44,973,231-48,074,273   | 1T, 3T, 5T                       |
| - 15q21.3-22.1   | 51,447,773-57,096,765   | 1T, 3T, 5T                       |
| - 17p13.1-12     | 8,791,713-13,954,919    | 1T, 3T, 5T, 6T                   |
| - 18p11.32-11.31 | 867,772-7,054,691       | 1T, 3T, 5T, 6T                   |
| - 18p11.23       | 7,579,318-7,816,623     | 1T, 3T, 5T, 6T                   |
| - 18p11.21       | 12,535,581-14,045,454   | 1T, 3T, 5T, 6T                   |
| - 18q12.1        | 25,987,928-27,146,504   | 1T, 3T, 5T, 6T                   |
| - 18q12.2-12.3   | 32,830,788-40,891,788   | 1T, 3T, 5T, 6T                   |
| - 18q21.1-21.2   | 46,349,352-50,885,624   | 1T, 2T, 3T, 5T, 6T               |
| - 18q21.33-23    | 58,072,967-71,547,371   | 1T, 2T, 3T, 5T, 6T               |
| - 18q23          | 71,882,399-74,199,087   | 1T, 2T, 3T, 5T, 6T               |
| - 22q11.1-11.21  | 15,685,581-16,590,946   | 3T, 5T                           |

---

## Supplementary Figures

**a**

| Array Type      | No. | Acc. No.     | # of Samples |         |       |
|-----------------|-----|--------------|--------------|---------|-------|
|                 |     |              | Normal       | Adenoma | Tumor |
| <b>NCBI GEO</b> |     |              |              |         |       |
| U 133 plus 2.0  | 1   | GSE4107      | 10           |         | 12    |
|                 | 2   | GSE4183      | 8            | 15      | 15    |
|                 | 3   | GSE5206      | 5            |         | 100   |
|                 | 4   | GSE8671      | 32           | 32      |       |
| U133A           | 5   | GSE2138      |              |         | 20    |
|                 | 6   | GSE4045      |              |         | 37    |
|                 | 7   | GSE4554      |              |         | 84    |
|                 | 8   | GSE7208      |              |         | 59    |
| <b>SMD</b>      |     |              |              |         |       |
| cDNA            | 9   | Unpublished* | 9            | 11      | 52    |
| <b>Total</b>    |     |              | 64           | 58      | 379   |

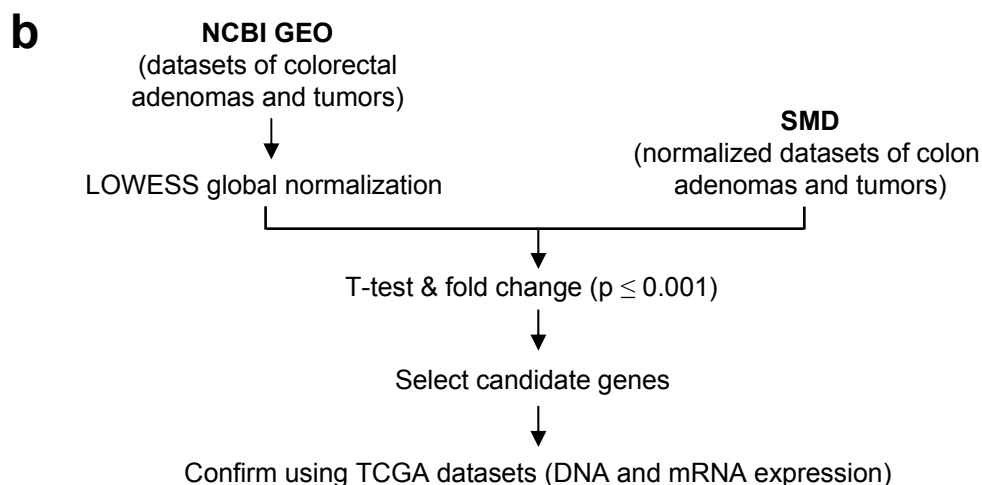

**Supplementary Fig. S1.** *In silico* analysis of candidate genes associated with CNAs in colon adenomas and carcinomas. (a) Relative expression of candidate genes associated with CNAs in colorectal adenomas and carcinomas was obtained from 9 datasets available on NCBI's GEO and SMD databases, consisting samples corresponding to 64 non-tumorous, 58 adenomas and 379 tumor samples. (b) Flow chart of candidate gene identification. The eight datasets obtained from NCBI's GEO were normalized by LOWESS analysis. The gene expression levels in colorectal adenomas and tumors relative to normal samples were determined by means of t-test significance ( $p \leq 0.001$ ). The selected candidate genes were further confirmed for DNA and mRNA copy numbers using TCGA colorectal DNA and expression datasets. \*Unpublished data was kindly provided by Chen Xin et al., Department of Biopharmaceutical Sciences, School of Pharmacy, University of California, San Francisco.

## Adenoma datasets

| Median Rank | p-Value | Gene  |   |   |   |   |   |
|-------------|---------|-------|---|---|---|---|---|
| 2178.0      | 9.10E-4 | PTPRM |   |   |   |   |   |
|             |         |       | 1 | 2 | 3 | 4 | 5 |

## Carcinoma datasets

| Median Rank | p-Value | Gene  |   |   |   |   |   |   |   |   |   |    |    |    |    |    |    |    |    |    |    |    |    |
|-------------|---------|-------|---|---|---|---|---|---|---|---|---|----|----|----|----|----|----|----|----|----|----|----|----|
| 5164.0      | 7.74E-7 | PTPRM |   |   |   |   |   |   |   |   |   |    |    |    |    |    |    |    |    |    |    |    |    |
|             |         |       | 1 | 2 | 3 | 4 | 5 | 6 | 7 | 8 | 9 | 10 | 11 | 12 | 13 | 14 | 15 | 16 | 17 | 18 | 19 | 20 | 21 |

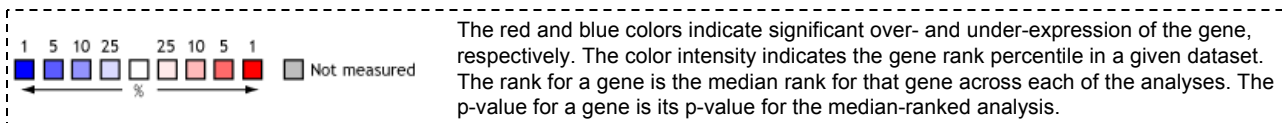

|                                                                                                                                                                                                                                                                                                                                                                                                                                                                                                                                                                                                                                                                                                                                                                                                                                                                                                                                                                                                                                                                                                                                                                             |                                                                                                                                                                                                                                                                                                                                                                                                                                                                                                                                                                                                                                                                                                                                                                                                                                                                                                                                                                                                                                                                                                                                                                              |
|-----------------------------------------------------------------------------------------------------------------------------------------------------------------------------------------------------------------------------------------------------------------------------------------------------------------------------------------------------------------------------------------------------------------------------------------------------------------------------------------------------------------------------------------------------------------------------------------------------------------------------------------------------------------------------------------------------------------------------------------------------------------------------------------------------------------------------------------------------------------------------------------------------------------------------------------------------------------------------------------------------------------------------------------------------------------------------------------------------------------------------------------------------------------------------|------------------------------------------------------------------------------------------------------------------------------------------------------------------------------------------------------------------------------------------------------------------------------------------------------------------------------------------------------------------------------------------------------------------------------------------------------------------------------------------------------------------------------------------------------------------------------------------------------------------------------------------------------------------------------------------------------------------------------------------------------------------------------------------------------------------------------------------------------------------------------------------------------------------------------------------------------------------------------------------------------------------------------------------------------------------------------------------------------------------------------------------------------------------------------|
| <p><u>Adenoma datasets</u></p> <ol style="list-style-type: none"> <li>1. Colorectal Adenoma Epithelia vs. Normal Gaspar Colon, Am J Pathol, 2008</li> <li>2. Colon Adenoma vs. Normal Sabates-Bellver Colon, Mol Cancer Res, 2007</li> <li>3. Rectal Adenoma vs. Normal Sabates-Bellver Colon, Mol Cancer Res, 2007</li> <li>4. Colon Adenoma Epithelia vs. Normal Skrzypczak Colorectal 2, PLoS One, 2010</li> <li>5. Colon Adenoma vs. Normal Skrzypczak Colorectal 2, PLoS One, 2010</li> </ol> <p><u>Carcinoma datasets</u></p> <ol style="list-style-type: none"> <li>1. Rectal Adenocarcinoma vs. Normal Gaedcke Colorectal, Genes Chromosomes Cancer, 2010</li> <li>2. Colorectal Carcinoma vs. Normal Graudens Colon, Genome Biol, 2006</li> <li>3. Colorectal Carcinoma vs. Normal Hong Colorectal, Clin Exp Metastasis, 2010</li> <li>4. Cecum Adenocarcinoma vs. Normal Kaiser Colon, Genome Biol, 2007</li> <li>5. Colon Adenocarcinoma vs. Normal Kaiser Colon, Genome Biol, 2007</li> <li>6. Colon Mucinous Adenocarcinoma vs. Normal Kaiser Colon, Genome Biol, 2007</li> <li>7. Rectal Adenocarcinoma vs. Normal Kaiser Colon, Genome Biol, 2007</li> </ol> | <ol style="list-style-type: none"> <li>8. Rectal Mucinous Adenocarcinoma vs. Normal Kaiser Colon, Genome Biol, 2007</li> <li>9. Rectosigmoid Adenocarcinoma vs. Normal Kaiser Colon, Genome Biol, 2007</li> <li>10. Colon Adenocarcinoma vs. Normal Ki Colon, Int J Cancer, 2007</li> <li>11. Colon Adenocarcinoma vs. Normal Notterman Colon, Cancer Res, 2001</li> <li>12. Colorectal Adenocarcinoma vs. Normal Skrzypczak Colorectal, PLoS One, 2010</li> <li>13. Colorectal Carcinoma vs. Normal Skrzypczak Colorectal, PLoS One, 2010</li> <li>14. Colon Carcinoma Epithelia vs. Normal Skrzypczak Colorectal 2, PLoS One, 2010</li> <li>15. Colon Carcinoma vs. Normal Skrzypczak Colorectal 2, PLoS One, 2010</li> <li>16. Cecum Adenocarcinoma vs. Normal TCGA Colorectal, 2011</li> <li>17. Colon Adenocarcinoma vs. Normal TCGA Colorectal, 2011</li> <li>18. Colon Mucinous Adenocarcinoma vs. Normal TCGA Colorectal, 2011</li> <li>19. Rectal Adenocarcinoma vs. Normal TCGA Colorectal, 2011</li> <li>20. Rectal Mucinous Adenocarcinoma vs. Normal TCGA Colorectal, 2011</li> <li>21. Rectosigmoid Adenocarcinoma vs. Normal TCGA Colorectal, 2011</li> </ol> |
|-----------------------------------------------------------------------------------------------------------------------------------------------------------------------------------------------------------------------------------------------------------------------------------------------------------------------------------------------------------------------------------------------------------------------------------------------------------------------------------------------------------------------------------------------------------------------------------------------------------------------------------------------------------------------------------------------------------------------------------------------------------------------------------------------------------------------------------------------------------------------------------------------------------------------------------------------------------------------------------------------------------------------------------------------------------------------------------------------------------------------------------------------------------------------------|------------------------------------------------------------------------------------------------------------------------------------------------------------------------------------------------------------------------------------------------------------------------------------------------------------------------------------------------------------------------------------------------------------------------------------------------------------------------------------------------------------------------------------------------------------------------------------------------------------------------------------------------------------------------------------------------------------------------------------------------------------------------------------------------------------------------------------------------------------------------------------------------------------------------------------------------------------------------------------------------------------------------------------------------------------------------------------------------------------------------------------------------------------------------------|

**Supplementary Fig. S2.** Loss of PTPRM is a frequent event in colorectal adenomas and carcinomas. The data sets related to colorectal adenoma and carcinoma samples were compared with normal samples by means of OncoPrint database. The 26 data sets (five adenoma and 21 carcinoma sets) used in this analysis were listed. The significance (p-value) of PTPRM down-regulation observed in adenoma and carcinoma datasets in OncoPrint analysis is shown.

### Colon adenocarcinoma

| Gene Set                     | Source | Size | ES     | NES    | NOM p-val | FDR q-val |
|------------------------------|--------|------|--------|--------|-----------|-----------|
| NECTIN PATHWAY               | PID    | 30   | -0.338 | -0.989 | 0.478     | 0.422     |
| ADHERENS JUNCTION            | KEGG   | 73   | -0.348 | -1.182 | 0.271     | 0.346     |
| CELL ADHESION MOLECULES CAMS | KEGG   | 125  | -0.359 | -1.2   | 0.268     | 0.651     |

### Rectal adenocarcinoma

| Gene Set                     | Source | Size | ES     | NES    | NOM p-val | FDR q-val |
|------------------------------|--------|------|--------|--------|-----------|-----------|
| NECTIN PATHWAY               | PID    | 30   | -0.348 | -0.997 | 0.432     | 0.396     |
| ADHERENS JUNCTION            | KEGG   | 73   | -0.473 | -1.538 | 0.057     | 0.058     |
| CELL ADHESION MOLECULES CAMS | KEGG   | 125  | -0.465 | -1.6   | 0.046     | 0.093     |

**Supplementary Fig. S3.** Gene set enrichment analysis (GSEA) analysis results. Three PTPRM-associated pathways were downloaded from molecular signature database of GSEA. The colon and rectal adenocarcinoma expression data sets were downloaded from TCGA database. The GSEA analysis of TCGA datasets was performed using default parameters to identify the significance of the deregulation of PTPRM-associated pathways. ES, enrichment score; NES, normalized enrichment score.
